# Supplementary figures and images for: Improving Genomic Predictions in Multi-Breed Cattle Populations: A Comparative Analysis of BayesR and GBLUP Models
Source: MDPI journal article supplement (doi:10.3390/genes15020253), 2024-02-18

# LD decay

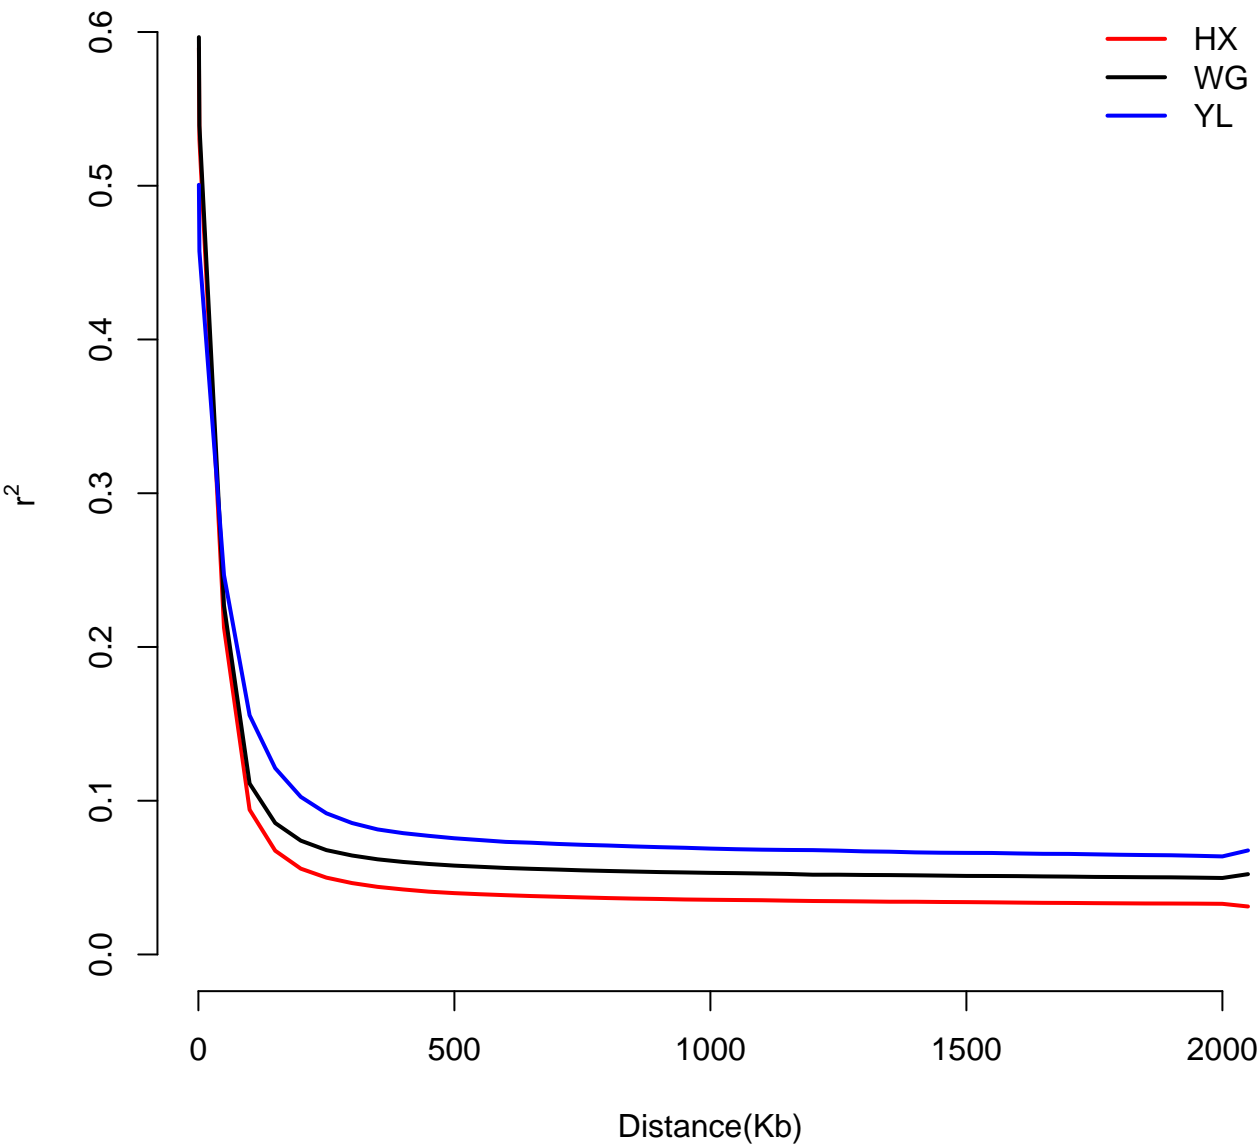

Supplement: s1 [file s1]

PCA Plot

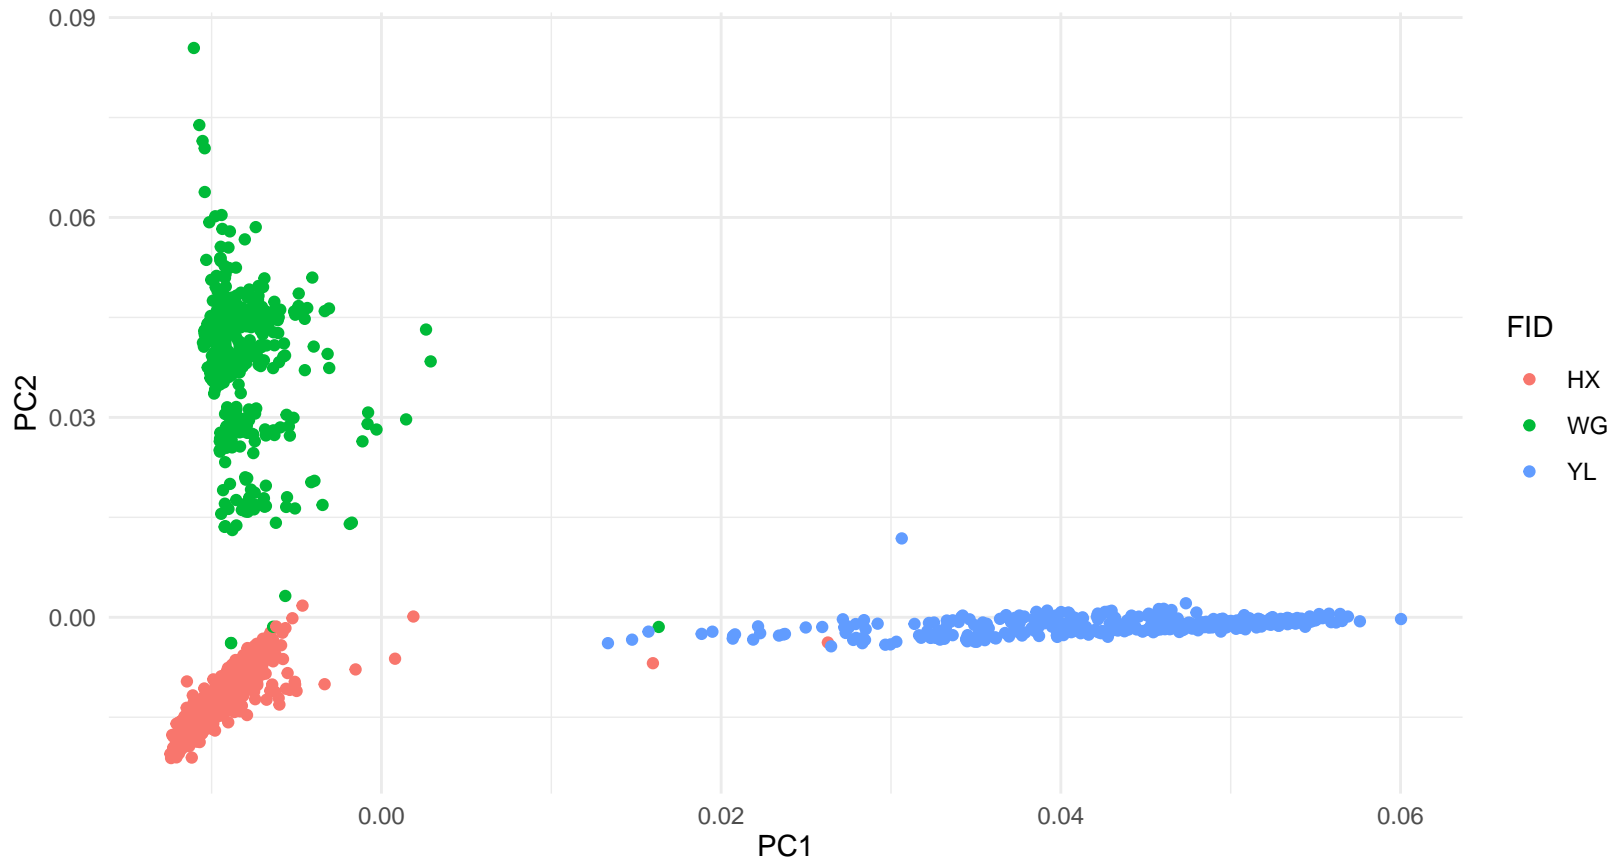

Supplement: s1 [file s1]
